# Supplementary material for: Last-Generation Genome–Environment Associations Reveal the Genetic Basis of Heat Tolerance in Common Bean (Phaseolus vulgaris L.)
Source: Front Genet. 2019 Nov 22;10:954. doi: 10.3389/fgene.2019.00954 (PMC6883007; doi:10.3389/fgene.2019.00954)
Supplement: Table S5 — List of 578 genes flanking 120 associated SNP markers in an expanded genomic window of 81 kb using PhytoMine (see note B) and the reference genome of common bean v2.1 [file Table_5.xlsx]

## Sheet: Hoja1
Gen	Gen Defline	Gene Length	Chr	Gene Location Start	Gene Location End
Phvul.001G029100		924	Chr01	2586811	2587734
Phvul.001G029200	(1 of 6) PF06404 - Phytosulfokine precursor protein (PSK) (PSK)	713	Chr01	2599026	2599738
Phvul.001G029300		492	Chr01	2606382	2606873
Phvul.001G029400	(1 of 1) PTHR31476:SF8 - EXPRESSED PROTEIN	4372	Chr01	2609505	2613876
Phvul.001G029500	(1 of 2) PTHR22952//PTHR22952:SF115 - CAMP-RESPONSE ELEMENT BINDING PROTEIN-RELATED // SUBFAMILY NOT NAMED	621	Chr01	2621709	2622329
Phvul.001G029600	(1 of 1) PTHR24115:SF490 - KINESIN-LIKE PROTEIN	7164	Chr01	2632816	2639979
Phvul.001G029700		1498	Chr01	2645465	2646962
Phvul.001G029800	(1 of 1) PTHR11864:SF0 - PRP40 PRE-MRNA PROCESSING FACTOR 40 HOMOLOG A (YEAST)	14502	Chr01	2647370	2661871
Phvul.001G029900		685	Chr01	2659008	2659692
Phvul.001G030000	(1 of 1) PTHR22594:SF33 - ASPARTATE--TRNA LIGASE, CYTOPLASMIC	5808	Chr01	2664779	2670586
Phvul.001G038100	(1 of 98) PF04043 - Plant invertase/pectin methylesterase inhibitor (PMEI)	528	Chr01	16151457	16151984
Phvul.001G074300	(1 of 1) PTHR13878//PTHR13878:SF51 - GULONOLACTONE OXIDASE // SUBFAMILY NOT NAMED	3969	Chr01	10141557	10145525
Phvul.001G074400	(1 of 1) PTHR10827:SF54 - CALCIUM-BINDING EF HAND FAMILY PROTEIN	2407	Chr01	10161789	10164195
Phvul.001G074500	(1 of 1) K09122 - hypothetical protein (K09122)	11636	Chr01	10189106	10200741
Phvul.001G171400	(1 of 2) PTHR22814:SF16 - CHLOROPLAST-TARGETED COPPER CHAPERONE PROTEIN	1928	Chr01	42833846	42835773
Phvul.001G171500	(1 of 2) PTHR12542:SF38 - EXOCYST SUBUNIT EXO70 FAMILY PROTEIN-RELATED	2167	Chr01	42860965	42863131
Phvul.001G171600	(1 of 3) PTHR24177:SF10 - ANKYRIN REPEAT-CONTAINING PROTEIN	2705	Chr01	42870009	42872713
Phvul.001G171700	(1 of 4) KOG0502//KOG0508//KOG4412 - Integral membrane ankyrin-repeat protein Kidins220 (protein kinase D substrate) // Ankyrin repeat protein // 26S proteasome regulatory complex, subunit PSMD10	3526	Chr01	42879471	42882996
Phvul.001G171800		1411	Chr01	42888762	42890172
Phvul.001G171900	(1 of 4) K15728 - phosphatidate phosphatase LPIN (LPIN)	7874	Chr01	42899394	42907267
Phvul.001G172000	(1 of 2) PTHR21229//PTHR21229:SF26 - LUNG SEVEN TRANSMEMBRANE RECEPTOR // SUBFAMILY NOT NAMED	1739	Chr01	42907640	42909378
Phvul.001G201400	(1 of 6) PF00620//PF00786 - RhoGAP domain (RhoGAP) // P21-Rho-binding domain (PBD)	3210	Chr01	46019320	46022529
Phvul.001G201500		927	Chr01	46024704	46025630
Phvul.001G201600	(1 of 3) K13207 - CUG-BP- and ETR3-like factor (CUGBP, BRUNOL, CELF)	5302	Chr01	46030342	46035643
Phvul.001G201700	(1 of 3) PTHR23196 - PAX TRANSCRIPTION ACTIVATION DOMAIN INTERACTING PROTEIN	5142	Chr01	46041513	46046654
Phvul.001G201800	(1 of 4) 1.1.1.331 - Secoisolariciresinol dehydrogenase	2741	Chr01	46047520	46050260
Phvul.001G201900		1501	Chr01	46050358	46051858
Phvul.001G202000	(1 of 9) K14486 - auxin response factor (K14486, ARF)	7080	Chr01	46052103	46059182
Phvul.001G202100	(1 of 2) PTHR23023//PTHR23023:SF142 - DIMETHYLANILINE MONOOXYGENASE // SUBFAMILY NOT NAMED	4251	Chr01	46087860	46092110
Phvul.001G211700	(1 of 2) PTHR10641:SF595 - MYB TRANSCRIPTION FACTOR	4406	Chr01	46805230	46809635
Phvul.001G211800	(1 of 1) K09517 - DnaJ homolog subfamily B member 11 (DNAJB11)	5014	Chr01	46817751	46822764
Phvul.001G211900	(1 of 3) PTHR21493:SF117 - ALPHA/BETA-HYDROLASES SUPERFAMILY PROTEIN	3114	Chr01	46825814	46828927
Phvul.001G212000	(1 of 2) PTHR22904:SF7 - T14P4.7 PROTEIN	3436	Chr01	46839724	46843159
Phvul.001G212100	(1 of 2) PTHR30620:SF4 - BETA-D-XYLOSIDASE 2-RELATED	5067	Chr01	46852480	46857546
Phvul.001G212200	(1 of 2) PTHR33052:SF19 - AGAA.5	591	Chr01	46863896	46864486
Phvul.001G212300	(1 of 38) PF14009 - Domain of unknown function (DUF4228) (DUF4228)	498	Chr01	46869394	46869891
Phvul.001G212400	(1 of 2) PTHR23012:SF93 - RING/FYVE/PHD ZINC FINGER-CONTAINING PROTEIN	2168	Chr01	46874925	46877092
Phvul.001G263700	(1 of 3) PTHR10980:SF18 - IMMUNOGLOBULIN E-SET SUPERFAMILY PROTEIN	1776	Chr01	51040498	51042273
Phvul.001G263800	(1 of 9) PF01823 - MAC/Perforin domain (MACPF)	5853	Chr01	51047027	51052879
Phvul.001G263900	(1 of 2) PF06884 - Protein of unknown function (DUF1264) (DUF1264)	1385	Chr01	51056916	51058300
Phvul.001G264000	(1 of 1) PTHR23270//PTHR23270:SF9 - PROGRAMMED CELL DEATH PROTEIN 11 PRE-RRNA PROCESSING PROTEIN RRP5 // SUBFAMILY NOT NAMED	5017	Chr01	51058320	51063336
Phvul.001G264066	(1 of 1) PF04408//PF07717 - Helicase associated domain (HA2) (HA2) // Oligonucleotide/oligosaccharide-binding (OB)-fold (OB_NTP_bind)	1381	Chr01	51063832	51065212
Phvul.001G264132	(1 of 3) PTHR18934//PTHR18934:SF120 - ATP-DEPENDENT RNA HELICASE // SUBFAMILY NOT NAMED	1432	Chr01	51065293	51066724
Phvul.001G264200	(1 of 1) K02293 - 15-cis-phytoene desaturase (PDS, crtP)	6782	Chr01	51068350	51075131
Phvul.001G264300	(1 of 1) PTHR11390:SF20 - DNA TOPOISOMERASE 3-BETA-1	9779	Chr01	51076268	51086046
Phvul.001G264400	(1 of 2) K13899 - cystatin-C (CST3)	393	Chr01	51087611	51088003
Phvul.001G264500	(1 of 1) PTHR24115:SF413 - KINESIN-LIKE PROTEIN KIN12A-RELATED	6733	Chr01	51092081	51098813
Phvul.001G264600	(1 of 1) PTHR35744:SF2 - C2H2 TYPE ZINC FINGER PROTEIN	2771	Chr01	51100229	51102999
Phvul.001G264700	(1 of 5) K14006 - protein transport protein SEC23 (SEC23)	6206	Chr01	51104327	51110532
Phvul.001G264800		1176	Chr01	51111602	51112777
Phvul.001G264900		1154	Chr01	51116256	51117409
Phvul.001G265000		6617	Chr01	51118568	51125184
Phvul.001G266300	(1 of 2) PTHR10015:SF157 - HEAT STRESS TRANSCRIPTION FACTOR A-5	2044	Chr01	51197119	51199162
Phvul.001G266400	(1 of 1) PTHR33136:SF10 - PROTEIN RALF-LIKE 24-RELATED	1045	Chr01	51199986	51201030
Phvul.001G266500	(1 of 2) 3.3.1.1 - Adenosylhomocysteinase / SAHase	1991	Chr01	51205299	51207289
Phvul.001G266600	(1 of 2) PTHR11680//PTHR11680:SF11 - SERINE HYDROXYMETHYLTRANSFERASE // SUBFAMILY NOT NAMED	2834	Chr01	51207298	51210131
Phvul.001G266700	(1 of 197) PF01535//PF13041 - PPR repeat (PPR) // PPR repeat family (PPR_2)	1521	Chr01	51211174	51212694
Phvul.001G266800	(1 of 1) K10866 - DNA repair protein RAD50 (RAD50)	10467	Chr01	51214240	51224706
Phvul.001G266900	(1 of 10) PTHR13620 - 3-5 EXONUCLEASE	3489	Chr01	51226152	51229640
Phvul.001G267000	(1 of 1) PTHR10366:SF431 - UDP-GLUCURONATE 4-EPIMERASE 6	1828	Chr01	51235465	51237292
Phvul.001G267100	(1 of 252) PF00076 - RNA recognition motif. (a.k.a. RRM, RBD, or RNP domain) (RRM_1)	2014	Chr01	51239902	51241915
Phvul.001G267200	(1 of 1) PTHR34209:SF1 - RHODANESE/CELL CYCLE CONTROL PHOSPHATASE SUPERFAMILY PROTEIN	6937	Chr01	51244564	51251500
Phvul.001G267300	(1 of 11) KOG2922 - Uncharacterized conserved protein	2025	Chr01	51252106	51254130
Phvul.001G267400		4482	Chr01	51256405	51260886
Phvul.001G267500	(1 of 5) PTHR32468:SF17 - CATION/H(+) ANTIPORTER 10-RELATED	2791	Chr01	51261145	51263935
Phvul.001G267600	(1 of 2) PTHR22957//PTHR22957:SF329 - TBC1 DOMAIN FAMILY MEMBER GTPASE-ACTIVATING PROTEIN // SUBFAMILY NOT NAMED	5706	Chr01	51276757	51282462
Phvul.002G016300	(1 of 2) K10577 - ubiquitin-conjugating enzyme E2 I (UBE2I, UBC9)	8000	Chr02	1746117	1754116
Phvul.002G016400	(1 of 11) 2.4.1.272 - Soyasapogenol B glucuronide galactosyltransferase	1488	Chr02	1757208	1758695
Phvul.002G016500	(1 of 1) K18822 - soyasapogenol B glucuronide galactosyltransferase (UGT73P2)	1491	Chr02	1766217	1767707
Phvul.002G016600	(1 of 3) KOG1457 - RNA binding protein (contains RRM repeats)	4681	Chr02	1772953	1777633
Phvul.002G016700	(1 of 4) PTHR31729:SF0 - ETHYLENE-RESPONSIVE TRANSCRIPTION FACTOR ERF008-RELATED	1037	Chr02	1793860	1794896
Phvul.002G016800	(1 of 2) PTHR11911//PTHR11911:SF109 - INOSINE-5-MONOPHOSPHATE DEHYDROGENASE RELATED // SUBFAMILY NOT NAMED	5247	Chr02	1795828	1801074
Phvul.002G016900	(1 of 3) PTHR32467:SF18 - FLORAL HOMEOTIC PROTEIN APETALA 2	3509	Chr02	1817500	1821008
Phvul.002G018800		1227	Chr02	2008680	2009906
Phvul.002G018900	(1 of 1) K13168 - splicing factor, arginine/serine-rich 16 (SFRS16)	7113	Chr02	2023686	2030798
Phvul.002G019000	(1 of 10) PF07939 - Protein of unknown function (DUF1685) (DUF1685)	1772	Chr02	2039267	2041038
Phvul.002G019050		469	Chr02	2047152	2047620
Phvul.002G019100	(1 of 2) PTHR10015:SF166 - HEAT STRESS TRANSCRIPTION FACTOR B-1	1599	Chr02	2047621	2049219
Phvul.002G019200	(1 of 6) K03257 - translation initiation factor 4A (EIF4A)	2318	Chr02	2050564	2052881
Phvul.002G019300	(1 of 3) PTHR10891//PTHR10891:SF533 - EF-HAND CALCIUM-BINDING DOMAIN CONTAINING PROTEIN // SUBFAMILY NOT NAMED	805	Chr02	2081997	2082801
Phvul.002G019400	(1 of 3) PTHR31722:SF5 - EMB	1091	Chr02	2089946	2091036
Phvul.002G019500	(1 of 2) PTHR10265:SF25 - CYCLIN-DEPENDENT KINASE INHIBITOR 6	2055	Chr02	2099332	2101386
Phvul.002G135900	(1 of 9) PTHR21493//PTHR21493:SF2 - CGI-141-RELATED/LIPASE CONTAINING PROTEIN // SUBFAMILY NOT NAMED	2859	Chr02	28074321	28077179
Phvul.002G136000	(1 of 1) KOG3584 - cAMP response element binding protein and related transcription factors	12315	Chr02	28087643	28099957
Phvul.002G136100	(1 of 2) PTHR24078:SF193 - DNAJ HOMOLOG SUBFAMILY C MEMBER 2	2116	Chr02	28102316	28104431
Phvul.002G136200	(1 of 1) PTHR31062:SF16 - XYLOGLUCAN ENDOTRANSGLUCOSYLASE/HYDROLASE PROTEIN 29-RELATED	3051	Chr02	28119482	28122532
Phvul.002G136300	(1 of 1) 2.4.1.12//2.4.2.24 - Cellulose synthase (UDP-forming) / UDP-glucose-cellulose glucosyltransferase // 1,4-beta-D-xylan synthase	5002	Chr02	28133854	28138855
Phvul.002G139200	(1 of 2) 4.1.1.32//4.1.1.49 - Phosphoenolpyruvate carboxykinase (GTP) / Phosphopyruvate carboxylase // Phosphoenolpyruvate carboxykinase (ATP) / Phosphopyruvate carboxylase	6254	Chr02	29011297	29017550
Phvul.002G140850	(1 of 2) PTHR10579:SF59 - C3H4 TYPE ZINC FINGER PROTEIN-RELATED	2458	Chr02	29042220	29044677
Phvul.002G142500	(1 of 2) PTHR31734:SF24 - AUXIN-RESPONSIVE PROTEIN IAA9	4733	Chr02	29057914	29062646
Phvul.002G142600		1669	Chr02	29089405	29091073
Phvul.002G142700		4387	Chr02	29096896	29101282
Phvul.002G182000	(1 of 2) PTHR31062:SF44 - XYLOGLUCAN ENDOTRANSGLUCOSYLASE/HYDROLASE PROTEIN 27-RELATED	2813	Chr02	34218078	34220890
Phvul.002G182100	(1 of 2) PTHR10106:SF15 - TRANSMEMBRANE ASCORBATE FERRIREDUCTASE 3-RELATED	1208	Chr02	34239420	34240627
Phvul.002G182200	(1 of 2) PTHR21736:SF15 - PROTEIN OBERON 3	4510	Chr02	34243795	34248304
Phvul.002G182400		3517	Chr02	34253931	34257447
Phvul.002G182500	(1 of 1) PF00069//PF13947//PF14380 - Protein kinase domain (Pkinase) // Wall-associated receptor kinase galacturonan-binding (GUB_WAK_bind) // Wall-associated receptor kinase C-terminal (WAK_assoc)	3131	Chr02	34278243	34281373
Phvul.002G182600	(1 of 10) PF05623 - Protein of unknown function (DUF789) (DUF789)	10223	Chr02	34286575	34296797
Phvul.002G182700	(1 of 1) PTHR13794 - ENOLASE SUPERFAMILY, MANDELATE RACEMASE	4250	Chr02	34297050	34301299
Phvul.002G230100	(1 of 41) PF02701 - Dof domain, zinc finger (zf-Dof)	954	Chr02	40250995	40251948
Phvul.002G230200	(1 of 10) PTHR31992:SF8 - DOF ZINC FINGER PROTEIN DOF1.1-RELATED	2098	Chr02	40258919	40261016
Phvul.002G230300	(1 of 23) PF03110 - SBP domain (SBP)	2200	Chr02	40279842	40282041
Phvul.002G230400	(1 of 1) PTHR24089:SF388 - MITOCHONDRIAL ARGININE TRANSPORTER BAC1	8517	Chr02	40289835	40298351
Phvul.002G230500	(1 of 81) PF14111 - Domain of unknown function (DUF4283) (DUF4283)	743	Chr02	40307318	40308060
Phvul.002G230550	(1 of 4) K10695 - E3 ubiquitin-protein ligase RNF1/2 [EC:6.3.2.19] (RNF1_2)	6285	Chr02	40327495	40333779
Phvul.002G262700	(1 of 1) K17785 - mitofilin (IMMT, FCJ1, MNOS2)	6666	Chr02	43449888	43456553
Phvul.002G262800	(1 of 1) K09140 - pre-rRNA-processing protein TSR3 (TSR3)	8453	Chr02	43457258	43465710
Phvul.002G262900	(1 of 1) PTHR12460:SF4 - ENTH/VHS FAMILY PROTEIN	5317	Chr02	43467205	43472521
Phvul.002G263000	(1 of 4) K16282 - E3 ubiquitin-protein ligase RHA2 [EC:6.3.2.19] (RHA2)	647	Chr02	43476540	43477186
Phvul.002G263100		520	Chr02	43485353	43485872
Phvul.002G263200	(1 of 2) PTHR23012:SF50 - RING/FYVE/PHD ZINC FINGER-CONTAINING PROTEIN	3503	Chr02	43487660	43491162
Phvul.002G263300		3662	Chr02	43491571	43495232
Phvul.002G263400	(1 of 1) PTHR22952//PTHR22952:SF172 - CAMP-RESPONSE ELEMENT BINDING PROTEIN-RELATED // SUBFAMILY NOT NAMED	7668	Chr02	43509089	43516756
Phvul.002G263500	(1 of 1) PTHR11986:SF58 - ALANINE--GLYOXYLATE AMINOTRANSFERASE 2, MITOCHONDRIAL	3727	Chr02	43517780	43521506
Phvul.002G263600	(1 of 46) PF01535//PF13041//PF13812 - PPR repeat (PPR) // PPR repeat family (PPR_2) // Pentatricopeptide repeat domain (PPR_3)	2502	Chr02	43527410	43529911
Phvul.002G263700	(1 of 273) PF00067 - Cytochrome P450 (p450)	1977	Chr02	43532992	43534968
Phvul.002G286900	(1 of 6) PTHR10774//PTHR10774:SF58 - EXTENDED SYNAPTOTAGMIN-RELATED // SUBFAMILY NOT NAMED	1518	Chr02	45614259	45615776
Phvul.002G287000	(1 of 2) PTHR34067:SF1 - METHYL-CPG-BINDING DOMAIN-CONTAINING PROTEIN 13	6895	Chr02	45616711	45623605
Phvul.002G287100	(1 of 2) K03137 - transcription initiation factor TFIIE subunit beta (TFIIE2, GTF2E2, TFA2)	2973	Chr02	45626413	45629385
Phvul.002G287200	(1 of 7) PF07876 - Stress responsive A/B Barrel Domain (Dabb)	6779	Chr02	45630068	45636846
Phvul.002G287300		820	Chr02	45634253	45635072
Phvul.002G287400	(1 of 1) PTHR24031:SF324 - DEAD-BOX ATP-DEPENDENT RNA HELICASE 33-RELATED	4822	Chr02	45637626	45642447
Phvul.002G287500	(1 of 1) PTHR32191:SF22 - TETRASPANIN-10	4039	Chr02	45643052	45647090
Phvul.002G287600	(1 of 1) PTHR23270:SF7 - NUCLEIC ACID-BINDING, OB-FOLD-LIKE PROTEIN	6808	Chr02	45654641	45661448
Phvul.002G287604	(1 of 7) K09377 - cysteine and glycine-rich protein (CSRP)	2624	Chr02	45663190	45665813
Phvul.002G287608	(1 of 2) PTHR31775:SF5 - REMORIN FAMILY PROTEIN-RELATED	3689	Chr02	45665011	45668699
Phvul.002G287612		528	Chr02	45674043	45674570
Phvul.002G287700	(1 of 1) KOG0963//KOG0978//KOG4593 - Transcription factor/CCAAT displacement protein CDP1 // E3 ubiquitin ligase involved in syntaxin degradation // Mitotic checkpoint protein MAD1	5390	Chr02	45686779	45692168
Phvul.003G021000	(1 of 2) PTHR33077:SF7 - PROTEIN TIFY 6A-RELATED	4023	Chr03	1988089	1992111
Phvul.003G021100	(1 of 1) K15166 - mediator of RNA polymerase II transcription subunit 23 (MED23)	31924	Chr03	1998312	2030235
Phvul.003G021200		3482	Chr03	2031799	2035280
Phvul.003G021300	(1 of 1) PTHR11562//PTHR11562:SF60 - CATION EFFLUX PROTEIN/ ZINC TRANSPORTER // SUBFAMILY NOT NAMED	2780	Chr03	2036314	2039093
Phvul.003G021400	(1 of 3) PTHR31080:SF10 - PLANT INVERTASE/PECTIN METHYLESTERASE INHIBITOR DOMAIN-CONTAINING PROTEIN	859	Chr03	2051898	2052756
Phvul.003G021500	(1 of 3) PTHR31080:SF10 - PLANT INVERTASE/PECTIN METHYLESTERASE INHIBITOR DOMAIN-CONTAINING PROTEIN	748	Chr03	2053150	2053897
Phvul.003G021600	(1 of 1) 4.1.2.53 - 2-keto-3-deoxy-L-rhamnonate aldolase / KDR aldolase	2597	Chr03	2059483	2062079
Phvul.003G021700	(1 of 1198) 2.7.11.1 - Non-specific serine/threonine protein kinase / Threonine-specific protein kinase	4689	Chr03	2063406	2068094
Phvul.003G026900	(1 of 1) 2.4.1.182 - Lipid-A-disaccharide synthase	4563	Chr03	2585868	2590430
Phvul.003G027000	(1 of 1) PTHR31321:SF23 - PECTINESTERASE PPME1-RELATED	2465	Chr03	2593111	2595575
Phvul.003G027100	(1 of 1) PTHR31079:SF9 - NAC DOMAIN-CONTAINING PROTEIN 8	4327	Chr03	2600637	2604963
Phvul.003G027200		850	Chr03	2617713	2618562
Phvul.003G027300	(1 of 1) PTHR11584:SF316 - SERINE/THREONINE-PROTEIN KINASE STN7, CHLOROPLASTIC	5209	Chr03	2628079	2633287
Phvul.003G027400	(1 of 1) PTHR13778:SF4 - GALACTURONOSYLTRANSFERASE-LIKE 3-RELATED	2059	Chr03	2636098	2638156
Phvul.003G027500	(1 of 2) PTHR27003:SF5 - DI-GLUCOSE BINDING PROTEIN WITH LEUCINE-RICH REPEAT DOMAIN	13156	Chr03	2641777	2654932
Phvul.003G028100	(1 of 1) PF13483 - Beta-lactamase superfamily domain (Lactamase_B_3)	10249	Chr03	2800491	2810739
Phvul.003G028200	(1 of 1) PTHR23030:SF18 - ENDOSOMAL TARGETING BRO1-LIKE DOMAIN-CONTAINING PROTEIN	3583	Chr03	2812844	2816426
Phvul.003G028300	(1 of 1) K15168 - mediator of RNA polymerase II transcription subunit 25 (MED25)	18572	Chr03	2822920	2841491
Phvul.003G028400	(1 of 2) PTHR22950:SF327 - LYSINE HISTIDINE TRANSPORTER-LIKE 6	3757	Chr03	2851808	2855564
Phvul.003G028500	(1 of 2) K06891 - ATP-dependent Clp protease adaptor protein ClpS (clpS)	3146	Chr03	2858998	2862143
Phvul.003G028600	(1 of 1) PTHR13683:SF274 - ASPARTYL PROTEASE FAMILY PROTEIN	1899	Chr03	2865589	2867487
Phvul.003G032200	(1 of 74) PF00892 - EamA-like transporter family (EamA)	7887	Chr03	3250107	3257993
Phvul.003G032300	(1 of 3) PTHR10359:SF22 - DEMETER-LIKE PROTEIN 2-RELATED	8330	Chr03	3264828	3273157
Phvul.003G032400	(1 of 2) K14298 - mRNA export factor (RAE1, GLE2)	9225	Chr03	3276598	3285822
Phvul.003G032500	(1 of 16) K13947 - auxin efflux carrier family (PIN)	5498	Chr03	3327834	3333331
Phvul.003G032600		279	Chr03	3337087	3337365
Phvul.003G038400	(1 of 2) PTHR31096:SF13 - ACT DOMAIN-CONTAINING PROTEIN 5	4465	Chr03	4121926	4126390
Phvul.003G038500		507	Chr03	4139554	4140060
Phvul.003G038600	(1 of 1) PTHR36335:SF1 - CHAPERONE DNAJ-DOMAIN CONTAINING PROTEIN	6318	Chr03	4151102	4157419
Phvul.003G045000	(1 of 1) PTHR10358//PTHR10358:SF8 - ENDOSULFINE // SUBFAMILY NOT NAMED	3962	Chr03	5281072	5285033
Phvul.003G045100		237	Chr03	5296703	5296939
Phvul.003G045200	(1 of 1) PTHR11615:SF81 - CASPARIAN STRIP MEMBRANE PROTEIN 5	2184	Chr03	5302499	5304682
Phvul.003G045300	(1 of 1) PTHR33399:SF5 - PSBQ-LIKE PROTEIN 1, CHLOROPLASTIC	1850	Chr03	5304377	5306226
Phvul.003G045400	(1 of 1) KOG3100 - Uncharacterized conserved protein	3187	Chr03	5310731	5313917
Phvul.003G045500	(1 of 2) KOG3292 - Predicted membrane protein	7712	Chr03	5319869	5327580
Phvul.003G045600	(1 of 2) PTHR31719:SF40 - NAC TRANSCRIPTION FACTOR 29	1465	Chr03	5328410	5329874
Phvul.003G045700	(1 of 1) PTHR14304 - P30 DBC PROTEIN	10336	Chr03	5345027	5355362
Phvul.003G047300	(1 of 2) PTHR24093:SF272 - CADMIUM/ZINC-TRANSPORTING ATPASE HMA1, CHLOROPLASTIC-RELATED	346	Chr03	5836269	5836614
Phvul.003G047400	(1 of 2) PTHR11911//PTHR11911:SF109 - INOSINE-5-MONOPHOSPHATE DEHYDROGENASE RELATED // SUBFAMILY NOT NAMED	4746	Chr03	5840886	5845631
Phvul.003G047500	(1 of 1) PTHR24012:SF349 - POLYADENYLATE-BINDING PROTEIN 2-RELATED	9935	Chr03	5852623	5862557
Phvul.003G047600	(1 of 1) K10661 - E3 ubiquitin-protein ligase MARCH6 (MARCH6, DOA10)	7863	Chr03	5874305	5882167
Phvul.003G047700	(1 of 10) PF05911 - Filament-like plant protein, long coiled-coil (FPP)	4978	Chr03	5899324	5904301
Phvul.003G047800	(1 of 2) K02960 - small subunit ribosomal protein S16e (RP-S16e, RPS16)	441	Chr03	5909227	5909667
Phvul.003G047900	(1 of 6) K00588 - caffeoyl-CoA O-methyltransferase (E2.1.1.104)	1806	Chr03	5911749	5913554
Phvul.003G109801	(1 of 46) PF00407 - Pathogenesis-related protein Bet v I family (Bet_v_1)	707	Chr03	28183126	28183832
Phvul.003G109802	(1 of 46) PF00407 - Pathogenesis-related protein Bet v I family (Bet_v_1)	999	Chr03	28211950	28212948
Phvul.003G129500	(1 of 1) K18587 - ubiquinone biosynthesis protein COQ9 (COQ9)	3264	Chr03	32402437	32405700
Phvul.003G129600	(1 of 1) K09705 - hypothetical protein (K09705)	1062	Chr03	32407049	32408110
Phvul.003G129700	(1 of 1) PTHR11017:SF169 - DISEASE RESISTANCE PROTEIN-RELATED	5779	Chr03	32438934	32444712
Phvul.003G129800	(1 of 3) PTHR10338//PTHR10338:SF114 - VON WILLEBRAND FACTOR, TYPE A DOMAIN CONTAINING // SUBFAMILY NOT NAMED	8190	Chr03	32445835	32454024
Phvul.003G129900	(1 of 64) PF14416 - PMR5 N terminal Domain (PMR5N)	6282	Chr03	32461628	32467909
Phvul.003G140000	(1 of 197) PF01535//PF13041 - PPR repeat (PPR) // PPR repeat family (PPR_2)	1750	Chr03	34258351	34260100
Phvul.003G140100	(1 of 1) K00499 - choline monooxygenase (E1.14.15.7)	4321	Chr03	34250560	34254880
Phvul.003G140200	(1 of 3) PF00122//PF00689//PF00690//PF00702//PF12515 - E1-E2 ATPase (E1-E2_ATPase) // Cation transporting ATPase, C-terminus (Cation_ATPase_C) // Cation transporter/ATPase, N-terminus (Cation_ATPase_N) // haloacid dehalogenase-like hydrolase (Hydrolase) // Ca2+-ATPase N terminal autoinhibitory domain (CaATP_NAI)	22970	Chr03	34227226	34250195
Phvul.003G140426		546	Chr03	34187767	34188312
Phvul.003G140452	(1 of 1) PTHR23216 - NUCLEOLAR AND COILED-BODY PHOSPHOPROTEIN 1	4427	Chr03	34207932	34212358
Phvul.003G164800	(1 of 14) PF00069//PF00954//PF01453 - Protein kinase domain (Pkinase) // S-locus glycoprotein domain (S_locus_glycop) // D-mannose binding lectin (B_lectin)	2731	Chr03	38423162	38425892
Phvul.003G164900	(1 of 2) PTHR10783:SF44 - SPX DOMAIN-CONTAINING PROTEIN 1-RELATED	2677	Chr03	38433638	38436314
Phvul.003G165000	(1 of 2) PTHR31194//PTHR31194:SF12 - SHN SHINE , DNA BINDING / TRANSCRIPTION FACTOR // SUBFAMILY NOT NAMED	1161	Chr03	38447392	38448552
Phvul.003G165100	(1 of 1) PTHR22957//PTHR22957:SF288 - TBC1 DOMAIN FAMILY MEMBER GTPASE-ACTIVATING PROTEIN // SUBFAMILY NOT NAMED	3801	Chr03	38456045	38459845
Phvul.003G165200		1010	Chr03	38473405	38474414
Phvul.003G178800	(1 of 3) PTHR27000:SF18 - LEUCINE-RICH REPEAT-CONTAINING PROTEIN	2268	Chr03	40203271	40205538
Phvul.003G178900	(1 of 1) PTHR33021:SF14 - EARLY NODULIN-LIKE PROTEIN 5-RELATED	797	Chr03	40206109	40206905
Phvul.003G179000	(1 of 3) K13179 - ATP-dependent RNA helicase DDX18/HAS1 [EC:3.6.4.13] (DDX18, HAS1)	4913	Chr03	40208433	40213345
Phvul.003G179100	(1 of 3) K10401 - kinesin family member 18/19 (KIF18_19)	4544	Chr03	40223256	40227799
Phvul.003G179200	(1 of 10) PF04759 - Protein of unknown function, DUF617 (DUF617)	1375	Chr03	40239638	40241012
Phvul.003G179300	(1 of 2) PTHR11064:SF35 - PROTEIN DR1 HOMOLOG	3907	Chr03	40241702	40245608
Phvul.003G179400	(1 of 1) K13123 - G patch domain-containing protein 1 (GPATCH1)	11404	Chr03	40249844	40261247
Phvul.003G202300	(1 of 1) PF07001 - BAT2 N-terminus (BAT2_N)	10416	Chr03	42769627	42780042
Phvul.003G202400	(1 of 7) PTHR11220 - HEME-BINDING PROTEIN-RELATED	1724	Chr03	42785525	42787248
Phvul.003G202500	(1 of 1) PTHR11782//PTHR11782:SF45 - ADENOSINE/GUANOSINE DIPHOSPHATASE // SUBFAMILY NOT NAMED	11263	Chr03	42787599	42798861
Phvul.003G202600		464	Chr03	42794016	42794479
Phvul.003G202800	(1 of 1) PTHR23322//PTHR23322:SF32 - FAS-ASSOCIATED PROTEIN // SUBFAMILY NOT NAMED	2172	Chr03	42799841	42802012
Phvul.003G202900	(1 of 1) K03517 - quinolinate synthase (nadA)	6069	Chr03	42830505	42836573
Phvul.003G203000	(1 of 17) PF14365 - Domain of unknown function (DUF4409) (DUF4409)	3830	Chr03	42841542	42845371
Phvul.003G275500	(1 of 1) K18670 - dual specificity protein kinase YAK1 [EC:2.7.12.1] (YAK1)	18982	Chr03	51310644	51329625
Phvul.003G275600	(1 of 8) PF07333 - S locus-related glycoprotein 1 binding pollen coat protein (SLR1-BP) (SLR1-BP)	379	Chr03	51332821	51333199
Phvul.003G275700	(1 of 5) K14802 - phospholipid-transporting ATPase [EC:3.6.3.1] (DRS2, ATP8A)	6456	Chr03	51342918	51349373
Phvul.003G275800	(1 of 7) PTHR31089:SF4 - CYCLIC DOF FACTOR 2-RELATED	3038	Chr03	51353105	51356142
Phvul.003G275900		219	Chr03	51358169	51358387
Phvul.003G276000	(1 of 3) K14961 - COMPASS component SWD1 (RBBP5, SWD1, CPS50)	3862	Chr03	51359830	51363691
Phvul.003G276100	(1 of 1) K17783 - mitochondrial FAD-linked sulfhydryl oxidase [EC:1.8.3.2] (ERV1, GFER, ALR)	8257	Chr03	51365984	51374240
Phvul.003G276200	(1 of 2) PTHR11527//PTHR11527:SF144 - SMALL HEAT-SHOCK PROTEIN HSP20 FAMILY // SUBFAMILY NOT NAMED	1985	Chr03	51372196	51374180
Phvul.003G276300	(1 of 2) PTHR11785:SF338 - POLYAMINE TRANSPORTER RMV1	1760	Chr03	51376481	51378240
Phvul.003G276400	(1 of 3) K02873 - large subunit ribosomal protein L13e (RP-L13e, RPL13)	1158	Chr03	51385614	51386771
Phvul.003G276500	(1 of 3) K02873 - large subunit ribosomal protein L13e (RP-L13e, RPL13)	1158	Chr03	51380950	51382107
Phvul.003G276600	(1 of 4) PTHR17204:SF28 - F1C9.34 PROTEIN-RELATED	2042	Chr03	51387244	51389285
Phvul.003G280000	(1 of 2) PTHR10108:SF907 - METHYLTRANSFERASE PMT20-RELATED	5732	Chr03	51717768	51723499
Phvul.003G280100	(1 of 2) PTHR10108:SF907 - METHYLTRANSFERASE PMT20-RELATED	4504	Chr03	51725213	51729716
Phvul.003G280200		583	Chr03	51735907	51736489
Phvul.003G280300	(1 of 2) PTHR23083//PTHR23083:SF444 - TETRATRICOPEPTIDE REPEAT PROTEIN, TPR // SUBFAMILY NOT NAMED	3908	Chr03	51740308	51744215
Phvul.003G280400	(1 of 5) K12619 - 5'-3' exoribonuclease 2 (XRN2, RAT1)	13341	Chr03	51745439	51758779
Phvul.003G280500	(1 of 2) PTHR33914:SF2 - 18S PRE-RIBOSOMAL ASSEMBLY PROTEIN GAR2-RELATED PROTEIN	2316	Chr03	51761345	51763660
Phvul.003G280600	(1 of 1) K09716 - D-aminoacyl-tRNA deacylase [EC:3.1.1.96] (dtdA, GEK1)	5613	Chr03	51768348	51773960
Phvul.003G280700	(1 of 1) PTHR10741:SF5 - TRANSLIN-ASSOCIATED PROTEIN X	10566	Chr03	51776415	51786980
Phvul.003G280800	(1 of 1) PTHR11783:SF81 - CYTOSOLIC SULFOTRANSFERASE 12	1323	Chr03	51791627	51792949
Phvul.003G280900	(1 of 2) PTHR31096:SF13 - ACT DOMAIN-CONTAINING PROTEIN 5	3589	Chr03	51802643	51806231
Phvul.004G017400	(1 of 5) PTHR10791:SF42 - BIDIRECTIONAL SUGAR TRANSPORTER SWEET4-RELATED	9516	Chr04	2071770	2081285
Phvul.004G017450		366	Chr04	2103896	2104261
Phvul.004G017500	(1 of 1) PTHR24326:SF136 - HOMEOBOX-LEUCINE ZIPPER PROTEIN ATHB-54-RELATED	2936	Chr04	2104262	2107197
Phvul.004G017600	(1 of 1) PTHR14140:SF29 - METHYL-CPG-BINDING DOMAIN-CONTAINING PROTEIN 9	14278	Chr04	2107717	2121994
Phvul.004G017700	(1 of 3) PTHR14155//PTHR14155:SF103 - RING FINGER DOMAIN-CONTAINING // SUBFAMILY NOT NAMED	1062	Chr04	2130947	2132008
Phvul.004G017800	(1 of 1) PF09446 - VMA21-like domain (VMA21)	3211	Chr04	2132303	2135513
Phvul.004G017900	(1 of 197) PF01535//PF13041 - PPR repeat (PPR) // PPR repeat family (PPR_2)	2612	Chr04	2135290	2137901
Phvul.004G018000	(1 of 4) PTHR11699:SF180 - ALDEHYDE DEHYDROGENASE FAMILY 2 MEMBER B7, MITOCHONDRIAL	4739	Chr04	2140269	2145007
Phvul.004G029250	(1 of 72) PF02362 - B3 DNA binding domain (B3)	420	Chr04	3484460	3484879
Phvul.004G029300	(1 of 1) PTHR10994:SF67 - RETICULON-LIKE PROTEIN B16	2380	Chr04	3493695	3496074
Phvul.004G029400	(1 of 79) PF01535//PF13041//PF14432 - PPR repeat (PPR) // PPR repeat family (PPR_2) // DYW family of nucleic acid deaminases (DYW_deaminase)	5577	Chr04	3497264	3502840
Phvul.004G029500	(1 of 9) K13691 - pathogen-inducible salicylic acid glucosyltransferase [EC:2.4.1.-] Glc b1-2 SA (SGT1)	1860	Chr04	3503634	3505493
Phvul.004G029600	(1 of 1) PTHR10783:SF3 - VACUOLAR TRANSPORTER CHAPERONE 4	2896	Chr04	3507345	3510240
Phvul.004G029700	(1 of 4) PF09366 - Protein of unknown function (DUF1997) (DUF1997)	4228	Chr04	3516222	3520449
Phvul.004G029800	(1 of 2) PTHR10641//PTHR10641:SF546 - MYB-LIKE DNA-BINDING PROTEIN MYB // SUBFAMILY NOT NAMED	3046	Chr04	3544281	3547326
Phvul.004G032300	(1 of 1) 3.1.3.2//3.1.3.3//3.1.3.62//3.6.1.1//3.6.1.7 - Acid phosphatase / Phosphomonoesterase // Phosphoserine phosphatase // Multiple inositol-polyphosphate phosphatase / MIPP // Inorganic diphosphatase / Pyrophosphate phosphohydrolase // Acylphosphatase / Acylphosphate phosphohydrolase	7922	Chr04	3861791	3869712
Phvul.004G032400	(1 of 1) PF12204 - Domain of unknown function (DUF3598) (DUF3598)	4431	Chr04	3871939	3876369
Phvul.004G032500	(1 of 53) PF02298 - Plastocyanin-like domain (Cu_bind_like)	2086	Chr04	3878900	3880985
Phvul.004G032600	(1 of 1) K10903 - HUS1 checkpoint protein (HUS1)	1903	Chr04	3882754	3884656
Phvul.004G032700	(1 of 24) PTHR32212:SF126 - EMB	1152	Chr04	3886918	3888069
Phvul.004G032800	(1 of 1) PTHR33021:SF63 - LAMIN-LIKE PROTEIN	2356	Chr04	3892372	3894727
Phvul.004G032900	(1 of 4) 5.4.99.5 - Chorismate mutase / Hydroxyphenylpyruvate synthase	4688	Chr04	3898365	3903052
Phvul.004G033000	(1 of 2) PTHR12286:SF5 - SACCHAROPINE DEHYDROGENASE-LIKE OXIDOREDUCTASE	2291	Chr04	3905988	3908278
Phvul.004G033100	(1 of 1) K10597 - ubiquitin conjugation factor E4 B (UBE4B, UFD2)	9824	Chr04	3909164	3918987
Phvul.004G033200	(1 of 3) PTHR13139 - RING FINGER AND CCCH-TYPE ZINC FINGER DOMAIN-CONTAINING PROTEIN	3445	Chr04	3921783	3925227
Phvul.004G033300	(1 of 1) PF14234 - Domain of unknown function (DUF4336) (DUF4336)	5219	Chr04	3927605	3932823
Phvul.004G033600	(1 of 3) PTHR33349:SF1 - CALMODULIN-BINDING PROTEIN-LIKE PROTEIN	3810	Chr04	3941999	3945808
Phvul.004G051600	(1 of 3) 2.1.1.14 - 5-methyltetrahydropteroyltriglutamate--homocysteine S-methyltransferase / Tetrahydropteroylglutamate-homocysteine transmethylase	4414	Chr04	6866840	6871253
Phvul.004G051700	(1 of 1) PTHR10910:SF95 - DOUBLE-STRANDED RNA-BINDING PROTEIN 4	5669	Chr04	6872904	6878572
Phvul.004G052000	(1 of 5) PTHR11240:SF16 - RIBONUCLEASE 2	716	Chr04	6916505	6917220
Phvul.004G052101	(1 of 1198) 2.7.11.1 - Non-specific serine/threonine protein kinase / Threonine-specific protein kinase	4095	Chr04	6916515	6920609
Phvul.004G052200	(1 of 1) PTHR10502//PTHR10502:SF127 - ANNEXIN // SUBFAMILY NOT NAMED	1776	Chr04	6926272	6928047
Phvul.004G130100	(1 of 3) PTHR33414:SF2 - PLASTID MOVEMENT IMPAIRED1	3152	Chr04	42652943	42656094
Phvul.004G130200	(1 of 9) PTHR33107:SF1 - DR4 PROTEIN-RELATED	627	Chr04	42659758	42660384
Phvul.004G130300	(1 of 3) PTHR33414:SF2 - PLASTID MOVEMENT IMPAIRED1	1090	Chr04	42663108	42664197
Phvul.004G130400	(1 of 24) PF00197 - Trypsin and protease inhibitor (Kunitz_legume)	603	Chr04	42671463	42672065
Phvul.004G130500	(1 of 9) PTHR33107:SF1 - DR4 PROTEIN-RELATED	759	Chr04	42676552	42677310
Phvul.004G130600	(1 of 24) PF00197 - Trypsin and protease inhibitor (Kunitz_legume)	663	Chr04	42680318	42680980
Phvul.004G130700	(1 of 24) PF00197 - Trypsin and protease inhibitor (Kunitz_legume)	629	Chr04	42705678	42706306
Phvul.004G134300	(1 of 15) PTHR11017//PTHR11017:SF171 - LEUCINE-RICH REPEAT-CONTAINING PROTEIN // SUBFAMILY NOT NAMED	4181	Chr04	43296842	43301022
Phvul.004G134400	(1 of 4) 1.1.1.179 - D-xylose 1-dehydrogenase (NADP(+)) / D-xylose-NADP dehydrogenase	3708	Chr04	43302167	43305874
Phvul.004G134500	(1 of 36) PF03140 - Plant protein of unknown function (DUF247)	2235	Chr04	43347374	43349608
Phvul.004G134600	(1 of 36) PF03140 - Plant protein of unknown function (DUF247)	1744	Chr04	43370455	43372198
Phvul.004G134700		499	Chr04	43379119	43379617
Phvul.004G134800	(1 of 36) PF03140 - Plant protein of unknown function (DUF247)	1488	Chr04	43389956	43391443
Phvul.004G134901	(1 of 2) PTHR11941//PTHR11941:SF70 - ENOYL-COA HYDRATASE-RELATED // SUBFAMILY NOT NAMED	7875	Chr04	43393939	43401813
Phvul.005G011200	(1 of 7) PTHR27002:SF129 - INACTIVE G-TYPE LECTIN S-RECEPTOR-LIKE SERINE/THREONINE-PROTEIN KINASE SRK-RELATED	3657	Chr05	979447	983103
Phvul.005G011300	(1 of 3) PTHR11527//PTHR11527:SF131 - SMALL HEAT-SHOCK PROTEIN HSP20 FAMILY // SUBFAMILY NOT NAMED	2084	Chr05	984129	986212
Phvul.005G011400	(1 of 3) K02868 - large subunit ribosomal protein L11e (RP-L11e, RPL11)	2059	Chr05	987417	989475
Phvul.005G011500	(1 of 2) K11308 - histone acetyltransferase MYST1 [EC:2.3.1.48] (MYST1, MOF, KAT8)	6254	Chr05	990644	996897
Phvul.005G011600	(1 of 1) PTHR22952:SF205 - ABSCISIC ACID-INSENSITIVE 5-LIKE PROTEIN 3	3310	Chr05	1003662	1006971
Phvul.005G011700	(1 of 1) PTHR31669:SF26 - PROTEIN FAR-RED ELONGATED HYPOCOTYL 3	8051	Chr05	1009546	1017596
Phvul.005G011800		351	Chr05	1016106	1016456
Phvul.005G011900	(1 of 2) PTHR31707:SF21 - PECTINESTERASE/PECTINESTERASE INHIBITOR 25-RELATED	4310	Chr05	1028117	1032426
Phvul.005G012000	(1 of 2) PTHR31707:SF48 - PECTINESTERASE/PECTINESTERASE INHIBITOR 24-RELATED	2485	Chr05	1032805	1035289
Phvul.005G012100	(1 of 2) K02906 - large subunit ribosomal protein L3 (RP-L3, MRPL3, rplC)	2656	Chr05	1036786	1039441
Phvul.005G012200	(1 of 7) K14514 - ethylene-insensitive protein 3 (EIN3)	3441	Chr05	1045458	1048898
Phvul.005G012300	(1 of 1) PTHR33512:SF2 - F16P17.15	933	Chr05	1052426	1053358
Phvul.005G012400	(1 of 8) KOG2615 - Permease of the major facilitator superfamily	5193	Chr05	1060450	1065642
Phvul.005G152800	(1 of 27) PF03101 - FAR1 DNA-binding domain (FAR1)	4367	Chr05	38285986	38290352
Phvul.005G152900	(1 of 2) PTHR10891:SF586 - CALMODULIN-LIKE PROTEIN 6-RELATED	1334	Chr05	38290734	38292067
Phvul.005G153000		1859	Chr05	38298287	38300145
Phvul.005G153100	(1 of 1198) 2.7.11.1 - Non-specific serine/threonine protein kinase / Threonine-specific protein kinase	3421	Chr05	38302695	38306115
Phvul.005G153200	(1 of 27) PF03101 - FAR1 DNA-binding domain (FAR1)	2977	Chr05	38307142	38310118
Phvul.005G153300	(1 of 2) PTHR10584:SF168 - F14I3.3 PROTEIN-RELATED	3270	Chr05	38316887	38320156
Phvul.005G153400	(1 of 1) PF14953 - Domain of unknown function (DUF4504) (DUF4504)	3569	Chr05	38320457	38324025
Phvul.005G153500	(1 of 2) PTHR31832:SF8 - B-BOX TYPE ZINC FINGER-CONTAINING PROTEIN-RELATED	2433	Chr05	38325489	38327921
Phvul.005G153600	(1 of 1) PTHR12136//PTHR12136:SF61 - STEROIDOGENIC ACUTE REGULATORY PROTEIN STAR // SUBFAMILY NOT NAMED	2569	Chr05	38330388	38332956
Phvul.005G153700	(1 of 1) PTHR10426:SF21 - POLLEN DEVELOPMENT PROTEIN LAP3	2611	Chr05	38335043	38337653
Phvul.005G153800	(1 of 1) 1.5.5.1 - Electron-transferring-flavoprotein dehydrogenase / ETF-ubiquinone oxidoreductase	8939	Chr05	38338741	38347679
Phvul.005G153900	(1 of 2) PTHR13690:SF80 - TRANSCRIPTION FACTOR POSF21-RELATED	3704	Chr05	38348258	38351961
Phvul.005G154000	(1 of 2) PTHR23189:SF45 - FLOWERING TIME CONTROL PROTEIN FPA	14860	Chr05	38354209	38369068
Phvul.005G175400	(1 of 3) PTHR18866//PTHR18866:SF99 - CARBOXYLASE:PYRUVATE/ACETYL-COA/PROPIONYL-COA CARBOXYLASE // SUBFAMILY NOT NAMED	5868	Chr05	40084045	40089912
Phvul.005G175450	(1 of 5) PF06232 - Embryo-specific protein 3, (ATS3) (ATS3)	1305	Chr05	40090658	40091962
Phvul.005G175500	(1 of 1) K14309 - nuclear pore complex protein Nup93 (NUP93, NIC96)	8333	Chr05	40093378	40101710
Phvul.005G175600	(1 of 1) K05674 - ATP-binding cassette, subfamily C (CFTR/MRP), member 10 (ABCC10)	14782	Chr05	40106465	40121246
Phvul.005G175700	(1 of 4) PF15697 - Domain of unknown function (DUF4666) (DUF4666)	800	Chr05	40124754	40125553
Phvul.005G175800	(1 of 57) 3.2.1.15 - Polygalacturonase / Pectinase	3238	Chr05	40128706	40131943
Phvul.005G175900	(1 of 3) 3.5.1.88 - Peptide deformylase / Polypeptide deformylase	2452	Chr05	40132644	40135095
Phvul.005G176000	(1 of 36) PF05553 - Cotton fibre expressed protein (DUF761)	481	Chr05	40138756	40139236
Phvul.005G176100	(1 of 2) PTHR10374//PTHR10374:SF15 - LACTOYLGLUTATHIONE LYASE GLYOXALASE I // SUBFAMILY NOT NAMED	1157	Chr05	40143865	40145021
Phvul.005G176200	(1 of 8) PF01918 - Alba (Alba)	2595	Chr05	40148378	40150972
Phvul.005G176300	(1 of 8) PF02451 - Nodulin (Nodulin)	1632	Chr05	40152536	40154167
Phvul.005G176400	(1 of 8) PF02451 - Nodulin (Nodulin)	1126	Chr05	40170752	40171877
Phvul.005G176425	(1 of 8) PF02451 - Nodulin (Nodulin)	2502	Chr05	40187425	40189926
Phvul.006G013900	(1 of 1) PTHR19241:SF158 - ABC TRANSPORTER G FAMILY MEMBER 23	2118	Chr06	6487721	6489838
Phvul.006G014000		4062	Chr06	6506750	6510811
Phvul.006G014100	(1 of 1) PTHR31956:SF10 - NON-SPECIFIC PHOSPHOLIPASE C2	10779	Chr06	6510897	6521675
Phvul.006G085800		1662	Chr06	19748163	19749824
Phvul.006G085900	(1 of 2) 1.5.3.16//1.5.3.17 - Spermine oxidase / SMO // Non-specific polyamine oxidase / Polyamine oxidase	5221	Chr06	19761544	19766764
Phvul.006G086000	(1 of 1) PTHR24073:SF570 - RAS-RELATED PROTEIN RABF2A-RELATED	5719	Chr06	19771878	19777596
Phvul.006G086100	(1 of 29) PF00501//PF13193 - AMP-binding enzyme (AMP-binding) // AMP-binding enzyme C-terminal domain (AMP-binding_C)	2545	Chr06	19784748	19787292
Phvul.006G088333	(1 of 3) K14455 - aspartate aminotransferase, mitochondrial (GOT2)	423	Chr06	17259384	17259806
Phvul.006G111100	(1 of 4) PF11331 - Probable zinc-ribbon domain (zinc_ribbon_12)	5588	Chr06	22002311	22007898
Phvul.006G111111		3715	Chr06	22013679	22017393
Phvul.006G111300	(1 of 2) PTHR32285:SF9 - PROTEIN TRICHOME BIREFRINGENCE-LIKE 25-RELATED	3320	Chr06	22021496	22024815
Phvul.006G111400	(1 of 3) PTHR11926//PTHR11926:SF197 - GLUCOSYL/GLUCURONOSYL TRANSFERASES // SUBFAMILY NOT NAMED	2203	Chr06	22045036	22047238
Phvul.006G111411	(1 of 3) 1.3.1.77 - Anthocyanidin reductase / ANR	2745	Chr06	22058908	22061652
Phvul.006G111600	(1 of 2) PTHR10366//PTHR10366:SF458 - NAD DEPENDENT EPIMERASE/DEHYDRATASE // SUBFAMILY NOT NAMED	2995	Chr06	22065240	22068234
Phvul.006G113166		420	Chr06	17272850	17273269
Phvul.006G115700	(1 of 3) PF13301 - Protein of unknown function (DUF4079) (DUF4079)	1902	Chr06	22409854	22411755
Phvul.006G115800	(1 of 2) PTHR33472:SF1 - EXTENSIN-RELATED	1502	Chr06	22415939	22417440
Phvul.006G115900	(1 of 3) PTHR19359:SF22 - CYTOCHROME B5 ISOFORM A	4942	Chr06	22420133	22425074
Phvul.006G116000	(1 of 3) PTHR24326:SF122 - HOMEOBOX-LEUCINE ZIPPER PROTEIN ATHB-12-RELATED	1347	Chr06	22427984	22429330
Phvul.006G116100	(1 of 85) PF02519 - Auxin responsive protein (Auxin_inducible)	937	Chr06	22433559	22434495
Phvul.006G116200	(1 of 75) K14488 - SAUR family protein (SAUR)	810	Chr06	22449879	22450688
Phvul.006G116300	(1 of 1) PTHR23177:SF24 - RHO GTPASE-ACTIVATING PROTEIN 3-RELATED	3750	Chr06	22470607	22474356
Phvul.006G116400	(1 of 1) PTHR22883:SF91 - PROTEIN S-ACYLTRANSFERASE 12-RELATED	3779	Chr06	22477665	22481443
Phvul.006G119400	(1 of 3) PTHR13620:SF8 - DEDDY 3'-5' EXONUCLEASE DOMAIN-CONTAINING PROTEIN-RELATED	618	Chr06	22784415	22785032
Phvul.006G119500	(1 of 3) PTHR13620:SF8 - DEDDY 3'-5' EXONUCLEASE DOMAIN-CONTAINING PROTEIN-RELATED	645	Chr06	22790111	22790755
Phvul.006G119600	(1 of 3) PTHR13620:SF8 - DEDDY 3'-5' EXONUCLEASE DOMAIN-CONTAINING PROTEIN-RELATED	855	Chr06	22798866	22799720
Phvul.006G119700	(1 of 3) PTHR34188:SF1 - T6A9.7 PROTEIN	3342	Chr06	22805239	22808580
Phvul.006G119800	(1 of 98) PF04043 - Plant invertase/pectin methylesterase inhibitor (PMEI)	1205	Chr06	22809064	22810268
Phvul.006G119900	(1 of 1) PTHR10682:SF20 - POLY(A) POLYMERASE	9519	Chr06	22818778	22828296
Phvul.006G120000	(1 of 1) PTHR20994:SF0 - ER MEMBRANE PROTEIN COMPLEX SUBUNIT 6	3279	Chr06	22839164	22842442
Phvul.006G120100	(1 of 1) PF13668 - Ferritin-like domain (Ferritin_2)	1399	Chr06	22848970	22850368
Phvul.006G120200	(1 of 1) PTHR21011//PTHR21011:SF4 - MITOCHONDRIAL 28S RIBOSOMAL PROTEIN S6 // SUBFAMILY NOT NAMED	3073	Chr06	22852069	22855141
Phvul.006G120300	(1 of 2) K09534 - DnaJ homolog subfamily C member 14 (DNAJC14)	6541	Chr06	22856133	22862673
Phvul.006G129000	(1 of 1) PTHR12634:SF17 - SIT4 PHOSPHATASE-ASSOCIATED FAMILY PROTEIN	15326	Chr06	23679221	23694546
Phvul.006G129100	(1 of 1) K14793 - ribosomal RNA-processing protein 9 (RRP9)	4122	Chr06	23695218	23699339
Phvul.006G129200	(1 of 10) PTHR31388:SF22 - PEROXIDASE 22-RELATED	3305	Chr06	23705846	23709150
Phvul.006G129300	(1 of 10) PTHR31388:SF22 - PEROXIDASE 22-RELATED	1384	Chr06	23715251	23716634
Phvul.006G129400	(1 of 10) PTHR31388:SF22 - PEROXIDASE 22-RELATED	2270	Chr06	23721882	23724151
Phvul.006G129500	(1 of 10) PTHR31388:SF22 - PEROXIDASE 22-RELATED	1842	Chr06	23728408	23730249
Phvul.006G129600	(1 of 10) PTHR31388:SF22 - PEROXIDASE 22-RELATED	2257	Chr06	23736485	23738741
Phvul.006G129700	(1 of 10) PTHR31388:SF22 - PEROXIDASE 22-RELATED	2765	Chr06	23750050	23752814
Phvul.006G129800	(1 of 10) PTHR31388:SF22 - PEROXIDASE 22-RELATED	4115	Chr06	23767219	23771333
Phvul.006G129900	(1 of 10) PTHR31388:SF22 - PEROXIDASE 22-RELATED	3369	Chr06	23771541	23774909
Phvul.006G130000	(1 of 10) PTHR31388:SF22 - PEROXIDASE 22-RELATED	5442	Chr06	23785101	23790542
Phvul.006G130100	(1 of 10) PTHR31388:SF22 - PEROXIDASE 22-RELATED	1670	Chr06	23797466	23799135
Phvul.006G130200	(1 of 1) PTHR12357:SF3 - FI21232P1	14260	Chr06	23800712	23814971
Phvul.006G130300	(1 of 3) PTHR10219//PTHR10219:SF28 - GLYCOLIPID TRANSFER PROTEIN-RELATED // SUBFAMILY NOT NAMED	3394	Chr06	23819833	23823226
Phvul.006G130400	(1 of 7) 3.1.1.26 - Galactolipase	2232	Chr06	23839908	23842139
Phvul.006G138000	(1 of 4) PF06552 - Plant specific mitochondrial import receptor subunit TOM20 (TOM20_plant)	2873	Chr06	17321370	17324242
Phvul.006G151200	(1 of 1) PTHR11079:SF79 - RNA PSEUDOURIDINE SYNTHASE 6, CHLOROPLASTIC	7357	Chr06	25654600	25661956
Phvul.006G151300	(1 of 4) PTHR10353:SF27 - BETA-GLUCOSIDASE 45-RELATED	8007	Chr06	25662222	25670228
Phvul.006G151400	(1 of 4) PTHR10353:SF27 - BETA-GLUCOSIDASE 45-RELATED	7619	Chr06	25675237	25682855
Phvul.006G151500	(1 of 2) PTHR11132:SF112 - GLUCOSE-6-PHOSPHATE/PHOSPHATE TRANSLOCATOR 1, CHLOROPLASTIC-RELATED	2994	Chr06	25686831	25689824
Phvul.006G151600	(1 of 1) PTHR22763:SF65 - E3 UBIQUITIN-PROTEIN LIGASE RHF1A	2655	Chr06	25696849	25699503
Phvul.006G151701	(1 of 2) PTHR10430:SF7 - PEROXIREDOXIN-2F, MITOCHONDRIAL	2442	Chr06	25703106	25705547
Phvul.006G151800	(1 of 2) PTHR10430:SF7 - PEROXIREDOXIN-2F, MITOCHONDRIAL	2876	Chr06	25706683	25709558
Phvul.006G151900		1366	Chr06	25712683	25714048
Phvul.006G152000	(1 of 1) K04708 - 3-dehydrosphinganine reductase (E1.1.1.102)	4234	Chr06	25724712	25728945
Phvul.006G152100	(1 of 64) PF14416 - PMR5 N terminal Domain (PMR5N)	2590	Chr06	25729533	25732122
Phvul.006G181700	(1 of 2) 2.1.1.220 - tRNA (adenine(58)-N(1))-methyltransferase / tRNA m(1)A(58) methyltransferase	2424	Chr06	28327134	28329557
Phvul.006G181800	(1 of 2) PTHR27000:SF219 - RECEPTOR-LIKE PROTEIN KINASE HSL1	4587	Chr06	28331938	28336524
Phvul.006G181900	(1 of 2) PTHR31621:SF0 - DUF679 DOMAIN MEMBRANE PROTEIN 7	892	Chr06	28351605	28352496
Phvul.006G182000	(1 of 1) PF00046//PF02791//PF05066//PF15612//PF15613//PF15614 - Homeobox domain (Homeobox) // DDT domain (DDT) // HB1, ASXL, restriction endonuclease HTH domain (HARE-HTH) // WSTF, HB1, Itc1p, MBD9 motif 1 (WHIM1) // WSTF, HB1, Itc1p, MBD9 motif 2 (WHIM2) // WSTF, HB1, Itc1p, MBD9 motif 3 (WHIM3)	10137	Chr06	28354820	28364956
Phvul.006G182100	(1 of 4) PTHR24078:SF188 - DNAJ HEAT SHOCK PROTEIN	3324	Chr06	28365116	28368439
Phvul.006G182200	(1 of 1) K03024 - DNA-directed RNA polymerase III subunit RPC7 (RPC7, POLR3G)	4303	Chr06	28370936	28375238
Phvul.006G182300	(1 of 1) PTHR11468:SF3 - GLYCOGEN PHOSPHORYLASE	16581	Chr06	28377228	28393808
Phvul.006G182400		3809	Chr06	28394945	28398753
Phvul.006G182500		743	Chr06	28399696	28400438
Phvul.006G182600		851	Chr06	28400959	28401809
Phvul.006G182700	(1 of 2) PTHR35274:SF2 - EXPRESSED PROTEIN-RELATED	1147	Chr06	28403013	28404159
Phvul.007G017200	(1 of 425) PF01535 - PPR repeat (PPR)	1668	Chr07	1164241	1165908
Phvul.007G017300	(1 of 1) PTHR15574:SF32 - TRANSDUCIN/WD40 DOMAIN-CONTAINING PROTEIN	5911	Chr07	1167539	1173449
Phvul.007G017400	(1 of 1) PTHR20922:SF15 - A_TM021B04.14 PROTEIN	2403	Chr07	1175261	1177663
Phvul.007G017500	(1 of 2) PTHR23504:SF36 - MAJOR FACILITATOR PROTEIN	7229	Chr07	1178175	1185403
Phvul.007G017600		689	Chr07	1192228	1192916
Phvul.007G017700	(1 of 1) PTHR10257//PTHR10257:SF28 - SERINE/THREONINE PROTEIN PHOSPHATASE 2A PP2A REGULATORY SUBUNIT B // SUBFAMILY NOT NAMED	2489	Chr07	1194746	1197234
Phvul.007G017800	(1 of 1) K18752 - transportin-1 (TNPO1)	14387	Chr07	1197622	1212008
Phvul.007G017900	(1 of 1) K09537 - DnaJ homolog subfamily C member 17 (DNAJC17)	4311	Chr07	1214904	1219214
Phvul.007G018000	(1 of 2) K02147 - V-type H+-transporting ATPase subunit B (ATPeV1B, ATP6B)	7147	Chr07	1221065	1228211
Phvul.007G018100	(1 of 4) PF11833 - Protein of unknown function (DUF3353) (DUF3353)	3374	Chr07	1231250	1234623
Phvul.007G018200	(1 of 15) PF04782 - Protein of unknown function (DUF632) (DUF632)	5015	Chr07	1237347	1242361
Phvul.007G076550	(1 of 10) PTHR31375:SF37 - PECTIN LYASE-LIKE SUPERFAMILY PROTEIN-RELATED	1650	Chr07	7259881	7261530
Phvul.007G076625	(1 of 16) K01213 - galacturan 1,4-alpha-galacturonidase (E3.2.1.67)	1696	Chr07	7267275	7268970
Phvul.007G076700	(1 of 2) PTHR31269:SF2 - S-TYPE ANION CHANNEL SLAH2-RELATED	3796	Chr07	7293624	7297419
Phvul.007G076800	(1 of 16) K01213 - galacturan 1,4-alpha-galacturonidase (E3.2.1.67)	1725	Chr07	7315326	7317050
Phvul.007G076900	(1 of 16) K01213 - galacturan 1,4-alpha-galacturonidase (E3.2.1.67)	17055	Chr07	7321660	7338714
Phvul.007G077000	(1 of 16) K01213 - galacturan 1,4-alpha-galacturonidase (E3.2.1.67)	1350	Chr07	7337018	7338367
Phvul.008G022700	(1 of 2) PTHR27001:SF217 - PROTEIN NSP-INTERACTING KINASE 1	4599	Chr08	1868922	1873520
Phvul.008G022800	(1 of 4) PTHR31319:SF10 - ZINC FINGER PROTEIN CONSTANS-RELATED	2687	Chr08	1883852	1886538
Phvul.008G022900	(1 of 7) PTHR13634 - RIBOSOME BIOGENESIS PROTEIN BRIX	2246	Chr08	1887864	1890109
Phvul.008G022925	(1 of 4) PTHR31319:SF10 - ZINC FINGER PROTEIN CONSTANS-RELATED	1370	Chr08	1896308	1897677
Phvul.008G022950	(1 of 4) K14820 - ribosome biogenesis protein BRX1 (BRX1, BRIX1)	3922	Chr08	1901214	1905135
Phvul.008G022975	(1 of 3) K11130 - H/ACA ribonucleoprotein complex subunit 3 (NOP10, NOLA3)	4004	Chr08	1907535	1911538
Phvul.008G023000	(1 of 4) K14820 - ribosome biogenesis protein BRX1 (BRX1, BRIX1)	2417	Chr08	1915107	1917523
Phvul.008G023100	(1 of 4) PF06876 - Plant self-incompatibility response (SCRL) protein (SCRL)	502	Chr08	1926485	1926986
Phvul.008G023200	(1 of 3) PTHR34450:SF1 - DEFENSIN-LIKE PROTEIN 226-RELATED	623	Chr08	1929549	1930171
Phvul.008G023300	(1 of 3) PTHR34450:SF1 - DEFENSIN-LIKE PROTEIN 226-RELATED	513	Chr08	1933941	1934453
Phvul.008G050200	(1 of 2) 3.1.2.2//3.1.2.20 - Palmitoyl-CoA hydrolase / Long-chain fatty-acyl-CoA hydrolase // Acyl-CoA hydrolase	3160	Chr08	4365876	4369035
Phvul.008G050300	(1 of 2) PTHR23213//PTHR23213:SF220 - FORMIN-RELATED // SUBFAMILY NOT NAMED	4214	Chr08	4369724	4373937
Phvul.008G050400	(1 of 2) PTHR11177:SF167 - RHODANESE-LIKE DOMAIN-CONTAINING PROTEIN 4, CHLOROPLASTIC	3228	Chr08	4378532	4381759
Phvul.008G050500	(1 of 1) PTHR31791:SF8 - ZIP4-LIKE PROTEIN	4350	Chr08	4382984	4387333
Phvul.008G050600	(1 of 1) PTHR12709:SF5 - DNA-DIRECTED RNA POLYMERASE I SUBUNIT RPA43	4911	Chr08	4391200	4396110
Phvul.008G050700	(1 of 13) PF07714//PF08263 - Protein tyrosine kinase (Pkinase_Tyr) // Leucine rich repeat N-terminal domain (LRRNT_2)	2778	Chr08	4403134	4405911
Phvul.008G050800	(1 of 1) PTHR11961//PTHR11961:SF8 - CYTOCHROME C // SUBFAMILY NOT NAMED	2314	Chr08	4410316	4412629
Phvul.008G050850	(1 of 13) PTHR23042//PTHR23042:SF57 - CIRCADIAN PROTEIN CLOCK/ARNT/BMAL/PAS // SUBFAMILY NOT NAMED	2787	Chr08	4438606	4441392
Phvul.008G072700	(1 of 1) KOG0843 - Transcription factor EMX1 and related HOX domain proteins	6381	Chr08	6804299	6810679
Phvul.008G072800	(1 of 2) PTHR24057:SF19 - SHAGGY-RELATED PROTEIN KINASE BETA-RELATED	4940	Chr08	6843656	6848595
Phvul.008G202600	(1 of 135) PF00646 - F-box domain (F-box)	3821	Chr08	54906455	54910275
Phvul.008G202700	(1 of 14) PF07816 - Protein of unknown function (DUF1645) (DUF1645)	1008	Chr08	54910799	54911806
Phvul.008G202800	(1 of 10) 3.4.16.2 - Lysosomal Pro-Xaa carboxypeptidase / Prolyl carboxypeptidase	3888	Chr08	54960971	54964858
Phvul.008G202900	(1 of 3) 4.1.3.4 - Hydroxymethylglutaryl-CoA lyase / HMG-CoA lyase	4663	Chr08	54966517	54971179
Phvul.008G203000	(1 of 2) PTHR34545:SF1 - CLAVATA3/ESR (CLE)-RELATED PROTEIN 21-RELATED	267	Chr08	54976598	54976864
Phvul.008G204300	(1 of 69) PF13962 - Domain of unknown function (PGG)	2289	Chr08	55201896	55204184
Phvul.008G204400	(1 of 4) PTHR24177:SF42 - ANKYRIN REPEAT FAMILY PROTEIN	8188	Chr08	55212460	55220647
Phvul.008G204500	(1 of 1) PTHR10252:SF36 - HISTONE SUPERFAMILY PROTEIN	3631	Chr08	55219751	55223381
Phvul.008G204600		3556	Chr08	55226702	55230257
Phvul.008G204700	(1 of 3) PTHR22763//PTHR22763:SF24 - RING ZINC FINGER PROTEIN // SUBFAMILY NOT NAMED	2685	Chr08	55235011	55237695
Phvul.008G204800	(1 of 2) PTHR11595:SF24 - ELONGATION FACTOR 1-BETA 1-RELATED	3124	Chr08	55240405	55243528
Phvul.008G204900		2004	Chr08	55246610	55248613
Phvul.008G205000	(1 of 3) PTHR10641:SF475 - MYB TRANSCRIPTION FACTOR-RELATED	1443	Chr08	55255486	55256928
Phvul.008G227700	(1 of 3) PTHR23012:SF87 - RING/FYVE/PHD ZINC FINGER-CONTAINING PROTEIN	2534	Chr08	57788450	57790983
Phvul.008G227800	(1 of 2) PTHR31300:SF2 - EMB	2725	Chr08	57803445	57806169
Phvul.008G227900	(1 of 1) PTHR11527//PTHR11527:SF152 - SMALL HEAT-SHOCK PROTEIN HSP20 FAMILY // SUBFAMILY NOT NAMED	721	Chr08	57808676	57809396
Phvul.008G228000	(1 of 11) PTHR11527:SF158 - 17.6 KDA CLASS I HEAT SHOCK PROTEIN 1-RELATED	848	Chr08	57812230	57813077
Phvul.008G228100	(1 of 11) PTHR11527:SF158 - 17.6 KDA CLASS I HEAT SHOCK PROTEIN 1-RELATED	480	Chr08	57815075	57815554
Phvul.008G228200	(1 of 1) PTHR32175:SF2 - SURFEIT LOCUS PROTEIN 2	5942	Chr08	57817776	57823717
Phvul.008G228300		2161	Chr08	57827987	57830147
Phvul.008G229400	(1 of 11) PTHR10795//PTHR10795:SF348 - PROPROTEIN CONVERTASE SUBTILISIN/KEXIN // SUBFAMILY NOT NAMED	6113	Chr08	58069110	58075222
Phvul.008G229500	(1 of 11) PTHR10795//PTHR10795:SF348 - PROPROTEIN CONVERTASE SUBTILISIN/KEXIN // SUBFAMILY NOT NAMED	6893	Chr08	58088392	58095284
Phvul.008G229600	(1 of 1) PTHR24073:SF582 - P-LOOP CONTAINING NUCLEOSIDE TRIPHOSPHATE HYDROLASES SUPERFAMILY PROTEIN-RELATED	2017	Chr08	58118024	58120040
Phvul.008G229700	(1 of 14) K14684 - solute carrier family 25 (mitochondrial phosphate transporter), member 23/24/25/41 (SLC25A23S)	4191	Chr08	58122168	58126358
Phvul.008G229800	(1 of 2) PTHR24209:SF7 - PROTEIN DA1-RELATED 2	4476	Chr08	58127183	58131658
Phvul.009G032200	(1 of 135) PF00646 - F-box domain (F-box)	3621	Chr09	7328902	7332522
Phvul.009G032300	(1 of 3) 2.5.1.54 - 3-deoxy-7-phosphoheptulonate synthase / Phospho-2-oxo-3-deoxyheptonate aldolase	4386	Chr09	7341850	7346235
Phvul.009G032400	(1 of 1) PTHR12480:SF5 - BIFUNCTIONAL ARGININE DEMETHYLASE AND LYSYL-HYDROXYLASE JMJD6	10354	Chr09	7351222	7361575
Phvul.009G032500	(1 of 2) PTHR18860//PTHR18860:SF26 - 14-3-3 PROTEIN // SUBFAMILY NOT NAMED	2243	Chr09	7366024	7368266
Phvul.009G032600	(1 of 2) PTHR33783:SF1 - F3F9.15	933	Chr09	7380686	7381618
Phvul.009G032700	(1 of 2) 6.1.1.11 - Serine--tRNA ligase / Seryl-tRNA synthetase	4696	Chr09	7402474	7407169
Phvul.009G068800	(1 of 1) PTHR22846:SF2 - F-BOX-LIKE/WD REPEAT-CONTAINING PROTEIN EBI	8990	Chr09	12074465	12083454
Phvul.009G068900	(1 of 5) PTHR10177:SF100 - CYCLIN-A3-2-RELATED	2010	Chr09	12086044	12088053
Phvul.009G069000	(1 of 5) PTHR10177:SF100 - CYCLIN-A3-2-RELATED	2178	Chr09	12092025	12094202
Phvul.009G069100	(1 of 5) PTHR10177:SF100 - CYCLIN-A3-2-RELATED	2452	Chr09	12096572	12099023
Phvul.009G069200	(1 of 3) K03016 - DNA-directed RNA polymerases I, II, and III subunit RPABC3 (RPB8, POLR2H)	2756	Chr09	12099988	12102743
Phvul.009G069300	(1 of 1) PTHR11945//PTHR11945:SF200 - MADS BOX PROTEIN // SUBFAMILY NOT NAMED	3521	Chr09	12104318	12107838
Phvul.009G069401	(1 of 20) 1.1.1.195 - Cinnamyl-alcohol dehydrogenase / CAD	5637	Chr09	12122701	12128337
Phvul.009G069500	(1 of 20) 1.1.1.195 - Cinnamyl-alcohol dehydrogenase / CAD	1317	Chr09	12129317	12130633
Phvul.009G069600	(1 of 1) PTHR12183:SF14 - RING-FINGER DOMAIN-CONTAINING PROTEIN	2853	Chr09	12131975	12134827
Phvul.009G069700	(1 of 4) K12347 - natural resistance-associated macrophage protein (SLC11A, NRAMP)	4071	Chr09	12141306	12145376
Phvul.009G069800	(1 of 3) PTHR12537:SF63 - PUMILIO HOMOLOG 14-RELATED	3108	Chr09	12156005	12159112
Phvul.009G072800	(1 of 2) 3.6.3.35 - Manganese-transporting ATPase / ABC-type manganese permease complex	27690	Chr09	12488116	12515805
Phvul.009G072900	(1 of 6) K16296 - serine carboxypeptidase-like clade I [EC:3.4.16.-] (SCPL-I)	5654	Chr09	12516961	12522614
Phvul.009G073000		1301	Chr09	12526648	12527948
Phvul.009G073100		1360	Chr09	12532371	12533730
Phvul.009G073200	(1 of 1) 2.3.1.43 - Phosphatidylcholine--sterol O-acyltransferase / Phospholipid--cholesterol acyltransferase	1910	Chr09	12535628	12537537
Phvul.009G073250		883	Chr09	12555198	12556080
Phvul.009G073300	(1 of 2) PTHR22849:SF6 - U-BOX DOMAIN-CONTAINING PROTEIN 30-RELATED	2139	Chr09	12572291	12574429
Phvul.009G073400	(1 of 1) PTHR31923:SF11 - BSD DOMAIN-CONTAINING PROTEIN	3988	Chr09	12583652	12587639
Phvul.009G241400		911	Chr09	36268317	36269227
Phvul.009G241500		171	Chr09	36269648	36269818
Phvul.009G241600	(1 of 60) 2.1.1.43 - Histone-lysine N-methyltransferase / Protein-lysine N-methyltransferase	17929	Chr09	36269651	36287579
Phvul.009G241700	(1 of 2) K02901 - large subunit ribosomal protein L27e (RP-L27e, RPL27)	772	Chr09	36296799	36297570
Phvul.009G241800	(1 of 6) 3.6.3.54 - Cu(+) exporting ATPase	7464	Chr09	36304429	36311892
Phvul.009G241900	(1 of 39) PF05678 - VQ motif (VQ)	875	Chr09	36321178	36322052
Phvul.009G242000	(1 of 1) PF12824 - Mitochondrial ribosomal protein subunit L20 (MRP-L20)	4339	Chr09	36326944	36331282
Phvul.009G242100	(1 of 1) PTHR13164//PTHR13164:SF5 - CALICYLIN BINDING PROTEIN // SUBFAMILY NOT NAMED	2447	Chr09	36332490	36334936
Phvul.009G242200	(1 of 1) PTHR34954:SF1 - PROTEIN TRIGALACTOSYLDIACYLGLYCEROL 4, CHLOROPLASTIC	3405	Chr09	36336268	36339672
Phvul.009G249000	(1 of 1) PTHR22844//PTHR22844:SF235 - F-BOX AND WD40 DOMAIN PROTEIN // SUBFAMILY NOT NAMED	9187	Chr09	36963118	36972304
Phvul.009G249100	(1 of 1) K12862 - pleiotropic regulator 1 (PLRG1, PRL1, PRP46)	6032	Chr09	36973638	36979669
Phvul.009G249200	(1 of 1) PTHR31561:SF6 - 3-KETOACYL-COA SYNTHASE 20-RELATED	3062	Chr09	36980035	36983096
Phvul.009G249300	(1 of 79) PF01535//PF13041//PF14432 - PPR repeat (PPR) // PPR repeat family (PPR_2) // DYW family of nucleic acid deaminases (DYW_deaminase)	2530	Chr09	36982980	36985509
Phvul.009G249400	(1 of 1) PTHR34458:SF5 - POLLEN OLE E 1 ALLERGEN AND EXTENSIN FAMILY PROTEIN	1769	Chr09	36990498	36992266
Phvul.009G249500	(1 of 6) PTHR33509:SF5 - LATE EMBRYOGENESIS ABUNDANT 3 (LEA3) FAMILY PROTEIN	738	Chr09	36993463	36994200
Phvul.009G249600		987	Chr09	37010335	37011321
Phvul.009G249700	(1 of 1) PTHR10791:SF29 - BIDIRECTIONAL SUGAR TRANSPORTER SWEET16-RELATED	3305	Chr09	37032274	37035578
Phvul.009G249800	(1 of 8) K10418 - dynein light chain LC8-type (DYNLL)	8108	Chr09	37045492	37053599
Phvul.009G249900	(1 of 8) K10418 - dynein light chain LC8-type (DYNLL)	4737	Chr09	37055074	37059810
Phvul.009G250000	(1 of 19) PF04570 - zinc-finger of the FCS-type, C2-C2 (zf-FLZ)	1181	Chr09	37065551	37066731
Phvul.009G250100	(1 of 2) PTHR11206:SF165 - MATE EFFLUX FAMILY PROTEIN	2100	Chr09	37075687	37077786
Phvul.010G020200	(1 of 2) K03022 - DNA-directed RNA polymerase III subunit RPC8 (RPC8, POLR3H)	4618	Chr10	2933875	2938492
Phvul.010G020300	(1 of 2) PTHR13020 - UBIQUITIN-ASSOCIATED UBA/UBX DOMAIN-CONTAINING	8742	Chr10	2940460	2949201
Phvul.010G020400		1941	Chr10	2952701	2954641
Phvul.010G020500	(1 of 1) K05292 - phosphatidylinositol glycan, class T (PIGT)	5669	Chr10	2955346	2961014
Phvul.010G020600	(1 of 3) PTHR11165//PTHR11165:SF61 - SKP1 // SUBFAMILY NOT NAMED	1546	Chr10	2961258	2962803
Phvul.010G020700	(1 of 1) PTHR14659:SF1 - ALPHA- AND GAMMA-ADAPTIN-BINDING PROTEIN P34	2736	Chr10	2967435	2970170
Phvul.010G020800	(1 of 5) KOG4374 - RNA-binding protein Bicaudal-C	10131	Chr10	2973727	2983857
Phvul.010G020900	(1 of 3) 2.3.1.160 - Vinorine synthase	1326	Chr10	2996794	2998119
Phvul.010G021001	(1 of 3) PTHR22835:SF262 - GDSL ESTERASE/LIPASE 5-RELATED	4501	Chr10	3006183	3010683
Phvul.010G021100	(1 of 2) PTHR12701:SF13 - B-CELL RECEPTOR-ASSOCIATED PROTEIN 31-LIKE PROTEIN	3977	Chr10	3013580	3017556
Phvul.010G024301	(1 of 28) PF00931//PF01582 - NB-ARC domain (NB-ARC) // TIR domain (TIR)	3611	Chr10	3434532	3438142
Phvul.010G024351	(1 of 62) PTHR11017//PTHR11017:SF163 - LEUCINE-RICH REPEAT-CONTAINING PROTEIN // SUBFAMILY NOT NAMED	3165	Chr10	3445959	3449123
Phvul.010G024400	(1 of 1) K09569 - FK506-binding protein 2 [EC:5.2.1.8] (FKBP2)	3614	Chr10	3456553	3460166
Phvul.010G024500	(1 of 2) PTHR10516:SF324 - PEPTIDYL-PROLYL CIS-TRANS ISOMERASE FKBP62	5746	Chr10	3468793	3474538
Phvul.010G024600	(1 of 3) K02995 - small subunit ribosomal protein S8e (RP-S8e, RPS8)	2460	Chr10	3478375	3480834
Phvul.010G024700	(1 of 1) PTHR32044:SF14 - XYLOGLUCAN GLYCOSYLTRANSFERASE 6-RELATED	8409	Chr10	3484577	3492985
Phvul.010G024833		883	Chr10	3560053	3560935
Phvul.010G024866	(1 of 2) K10838 - xeroderma pigmentosum group C-complementing protein (XPC)	6555	Chr10	3575983	3582537
Phvul.010G029900	(1 of 1) K09561 - STIP1 homology and U-box containing protein 1 (STUB1, CHIP)	10298	Chr10	4345189	4355486
Phvul.010G030000	(1 of 2) PTHR23500:SF55 - SUGAR TRANSPORT PROTEIN 1-RELATED	1632	Chr10	4357819	4359450
Phvul.010G030100	(1 of 2) PTHR24351:SF69 - AGC (CAMP-DEPENDENT, CGMP-DEPENDENT AND PROTEIN KINASE C) KINASE FAMILY PROTEIN-RELATED	2270	Chr10	4365912	4368181
Phvul.010G030200	(1 of 2) K03012 - DNA-directed RNA polymerase II subunit RPB4 (RPB4, POLR2D)	3784	Chr10	4375919	4379702
Phvul.010G030300	(1 of 73) KOG0254 - Predicted transporter (major facilitator superfamily)	1547	Chr10	4380611	4382157
Phvul.010G030500	(1 of 2) PTHR23130:SF95 - AUXIN-RESPONSIVE PROTEIN-RELATED	898	Chr10	4424378	4425275
Phvul.010G038100	(1 of 57) 3.2.1.15 - Polygalacturonase / Pectinase	4450	Chr10	5625519	5629968
Phvul.010G038200	(1 of 4) 1.1.1.54//1.3.1.102//1.3.1.74 - Allyl-alcohol dehydrogenase // 2-alkenal reductase (NADP(+)) / NADPH-dependent alkenal/one oxidoreductase // 2-alkenal reductase (NAD(P)(+)) / NADPH:2-alkenal alpha,beta-hydrogenase	3682	Chr10	5643093	5646774
Phvul.010G038300	(1 of 2) PF12070 - Protein of unknown function (DUF3550/UPF0682) (DUF3550)	12266	Chr10	5670989	5683254
Phvul.010G052700	(1 of 36) PF03140 - Plant protein of unknown function (DUF247)	3158	Chr10	8133056	8136213
Phvul.010G052800		1386	Chr10	8146630	8148015
Phvul.010G052900	(1 of 36) PF03140 - Plant protein of unknown function (DUF247)	3217	Chr10	8155596	8158812
Phvul.010G053000	(1 of 36) PF03140 - Plant protein of unknown function (DUF247)	1335	Chr10	8165115	8166449
Phvul.010G053100	(1 of 1) 1.14.13.70 - Sterol 14-alpha-demethylase / Obtusufoliol 14-demethylase	3154	Chr10	8166656	8169809
Phvul.010G053200	(1 of 1) PTHR10641:SF488 - DUO POLLEN 1	2065	Chr10	8178989	8181053
Phvul.010G053300	(1 of 2) KOG3734 - Predicted phosphoglycerate mutase	2706	Chr10	8182873	8185578
Phvul.010G053400	(1 of 73) KOG0254 - Predicted transporter (major facilitator superfamily)	1573	Chr10	8186510	8188082
Phvul.011G004000	(1 of 1) PTHR15856//PTHR15856:SF28 - PHD FINGER PROTEIN 20-RELATED // SUBFAMILY NOT NAMED	3292	Chr11	295377	298668
Phvul.011G004100	(1 of 1) PTHR13789:SF1 - FAD/NAD(P)-BINDING OXIDOREDUCTASE FAMILY PROTEIN-RELATED	3526	Chr11	302371	305896
Phvul.011G004200	(1 of 15) 5.3.4.1 - Protein disulfide-isomerase / S-S rearrangase	5009	Chr11	307196	312204
Phvul.011G004300	(1 of 1) K05019 - chloride channel, nucleotide-sensitive, 1A (CLNS1A)	3628	Chr11	315627	319254
Phvul.011G004400	(1 of 11) PF04674 - Phosphate-induced protein 1 conserved region (Phi_1)	1254	Chr11	323340	324593
Phvul.011G004500		1619	Chr11	341270	342888
Phvul.011G004600	(1 of 1) K03104 - signal recognition particle subunit SRP14 (SRP14)	2730	Chr11	344370	347099
Phvul.011G004700	(1 of 1) PTHR24356:SF169 - IRE	10900	Chr11	347965	358864
Phvul.011G004800	(1 of 2) 2.7.4.14 - UMP/CMP kinase / Uridine monophosphate-cytidine monophosphate phosphotransferase	3871	Chr11	359937	363807
Phvul.011G004900	(1 of 197) PF01535//PF13041 - PPR repeat (PPR) // PPR repeat family (PPR_2)	1953	Chr11	364387	366339
Phvul.011G005000	(1 of 2) PTHR31707:SF45 - PECTINESTERASE/PECTINESTERASE INHIBITOR 33-RELATED	3092	Chr11	367444	370535
Phvul.011G023500		1866	Chr11	2033365	2035230
Phvul.011G054100	(1 of 2) PTHR10891:SF586 - CALMODULIN-LIKE PROTEIN 6-RELATED	453	Chr11	4740937	4741389
Phvul.011G054200		4919	Chr11	4751053	4755971
Phvul.011G054300	(1 of 1198) 2.7.11.1 - Non-specific serine/threonine protein kinase / Threonine-specific protein kinase	3579	Chr11	4759334	4762912
Phvul.011G054400	(1 of 1) K16196 - eukaryotic translation initiation factor 2-alpha kinase 4 (EIF2AK4)	23959	Chr11	4766439	4790397
Phvul.011G054500	(1 of 1) PTHR34800:SF1 - TETRAPYRROLE-BINDING PROTEIN, CHLOROPLASTIC	1015	Chr11	4795363	4796377
Phvul.011G054600	(1 of 1) KOG3136 - Uncharacterized conserved protein	4407	Chr11	4797402	4801808
Phvul.011G054700	(1 of 3) 6.1.1.12 - Aspartate--tRNA ligase / Aspartyl-tRNA synthetase	6343	Chr11	4805870	4812212
Phvul.011G054800	(1 of 2) PTHR12444:SF2 - ARM REPEAT SUPERFAMILY PROTEIN	10804	Chr11	4820505	4831308
Phvul.011G057800	(1 of 2) 3.2.1.185 - Non-reducing end beta-L-arabinofuranosidase	6686	Chr11	5126661	5133346
Phvul.011G057900	(1 of 2) PTHR24351:SF107 - AGC (CAMP-DEPENDENT, CGMP-DEPENDENT AND PROTEIN KINASE C) KINASE FAMILY PROTEIN	1266	Chr11	5152180	5153445
Phvul.011G058000	(1 of 1) PTHR32467:SF12 - AP2-LIKE ETHYLENE-RESPONSIVE TRANSCRIPTION FACTOR PLT2	3217	Chr11	5175398	5178614
Phvul.011G058100	(1 of 2) PTHR10634//PTHR10634:SF32 - AN1-TYPE ZINC FINGER PROTEIN // SUBFAMILY NOT NAMED	1923	Chr11	5183094	5185016
Phvul.011G058200		536	Chr11	5201053	5201588
Phvul.011G058300	(1 of 4) PTHR13593:SF52 - F14J22.5 PROTEIN-RELATED	4242	Chr11	5214083	5218324
Phvul.011G058400	(1 of 1) PF03100 - CcmE (CcmE)	1043	Chr11	5220948	5221990
Phvul.011G058800	(1 of 3) PTHR14155:SF75 - E3 UBIQUITIN LIGASE BIG BROTHER	4746	Chr11	5255869	5260614
Phvul.011G058900		974	Chr11	5268122	5269095
Phvul.011G059000		1397	Chr11	5277164	5278560
Phvul.011G059100		315	Chr11	5294897	5295211
Phvul.011G059201	(1 of 1) PF11136 - Protein of unknown function (DUF2889) (DUF2889)	1551	Chr11	5314639	5316189
Phvul.011G059300	(1 of 4) PTHR24012:SF333 - POLYADENYLATE-BINDING PROTEIN RBP45B-RELATED	3492	Chr11	5318481	5321972
Phvul.011G059400	(1 of 2) PTHR11699//PTHR11699:SF192 - ALDEHYDE DEHYDROGENASE-RELATED // SUBFAMILY NOT NAMED	3253	Chr11	5325609	5328861
Phvul.011G072000		6031	Chr11	6598947	6604977
Phvul.011G072100	(1 of 2) PTHR32191:SF7 - TETRASPANIN-16-RELATED	4091	Chr11	6619750	6623840
Phvul.011G072200	(1 of 3) PTHR31301:SF14 - LOB DOMAIN-CONTAINING PROTEIN 1-RELATED	1944	Chr11	6635012	6636955
Phvul.011G072300	(1 of 1) PTHR11685:SF107 - C3H4 TYPE ZINC FINGER PROTEIN-RELATED	3720	Chr11	6660197	6663916
Phvul.011G072400	(1 of 2) 3.1.3.76 - Lipid-phosphate phosphatase / Soluble epoxide hydrolase	4560	Chr11	6672803	6677362
Phvul.011G072500	(1 of 1) PTHR35460:SF1 - TRANSLATION ELONGATION FACTOR EF-1 ALPHA	24116	Chr11	6679044	6703159
Phvul.011G076400	(1 of 2) K13106 - pre-mRNA-splicing factor CWC26 (BUD13, CWC26)	6755	Chr11	1965905	1972659
Phvul.011G076500	(1 of 2) K15456 - protein KTI12 (KTI12)	2448	Chr11	1972716	1975163
Phvul.011G076600	(1 of 4) PTHR13305 - RIBOSOME BIOGENESIS PROTEIN NOP10	1416	Chr11	1986109	1987524
Phvul.011G076700		4296	Chr11	2009606	2013901
Phvul.011G077301	(1 of 4) K14820 - ribosome biogenesis protein BRX1 (BRX1, BRIX1)	4792	Chr11	2023114	2027905
Phvul.011G080000	(1 of 3) K15501 - serine/threonine-protein phosphatase 6 regulatory subunit 3 (PPP6R3, SAPS3)	11498	Chr11	7357443	7368940
Phvul.011G080100	(1 of 4) PTHR31384:SF27 - AUXIN RESPONSE FACTOR 10-RELATED	3665	Chr11	7378711	7382375
Phvul.011G080200	(1 of 2) PTHR10071:SF184 - GATA TRANSCRIPTION FACTOR 10-RELATED	7731	Chr11	7411249	7418979
Phvul.011G080300	(1 of 1) 2.8.2.20 - Protein-tyrosine sulfotransferase / Tyrosylprotein sulfotransferase	4666	Chr11	7419997	7424662
Phvul.011G080400	(1 of 1) K16329 - pseudouridine-5'-phosphate glycosidase (psuG)	8889	Chr11	7433489	7442377
Phvul.011G153301	(1 of 1) PTHR22847//PTHR22847:SF490 - WD40 REPEAT PROTEIN // SUBFAMILY NOT NAMED	10078	Chr11	43721651	43731728
Phvul.011G157100	(1 of 2) PTHR33388:SF1 - F1K23.3	1895	Chr11	44782380	44784274
Phvul.011G165300	(1 of 1) PTHR13180 - SMALL MEMBRANE PROTEIN-RELATED	2382	Chr11	46840658	46843039
Phvul.011G165400		455	Chr11	46901611	46902065
Phvul.011G165500	(1 of 1) K03353 - anaphase-promoting complex subunit 6 (APC6, CDC16)	10643	Chr11	46912425	46923067
